# Supplementary material for: (-)-5-Demethoxygrandisin B a New Lignan from Virola surinamensis (Rol.) Warb. Leaves: Evaluation of the Leishmanicidal Activity by In Vitro and In Silico Approaches
Source: MDPI journal article supplement (doi:10.3390/pharmaceutics15092292), 2023-09-07

**Figure S1.** Mass spectrum of the precursor ion (new (-)-5-demethoxygrandisin B) and its isotopes.

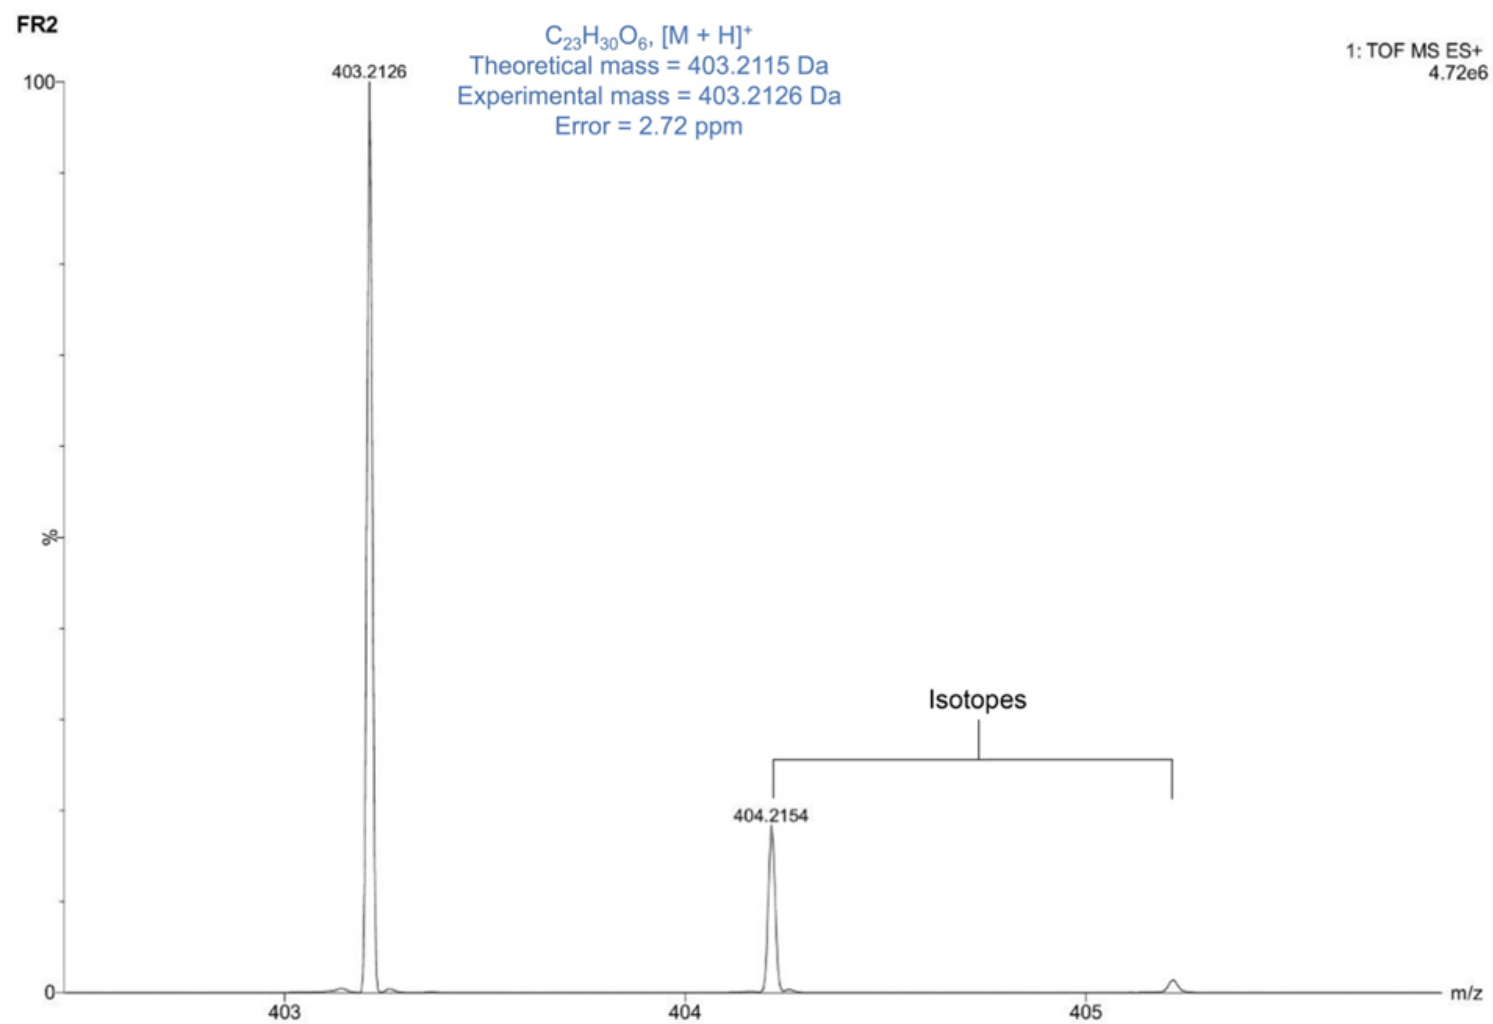

**Figure S2.**  $^1\text{H}$  NMR for the new (-)-5-demethoxygrandisin B in  $\text{CDCl}_3$  (400 MHz)

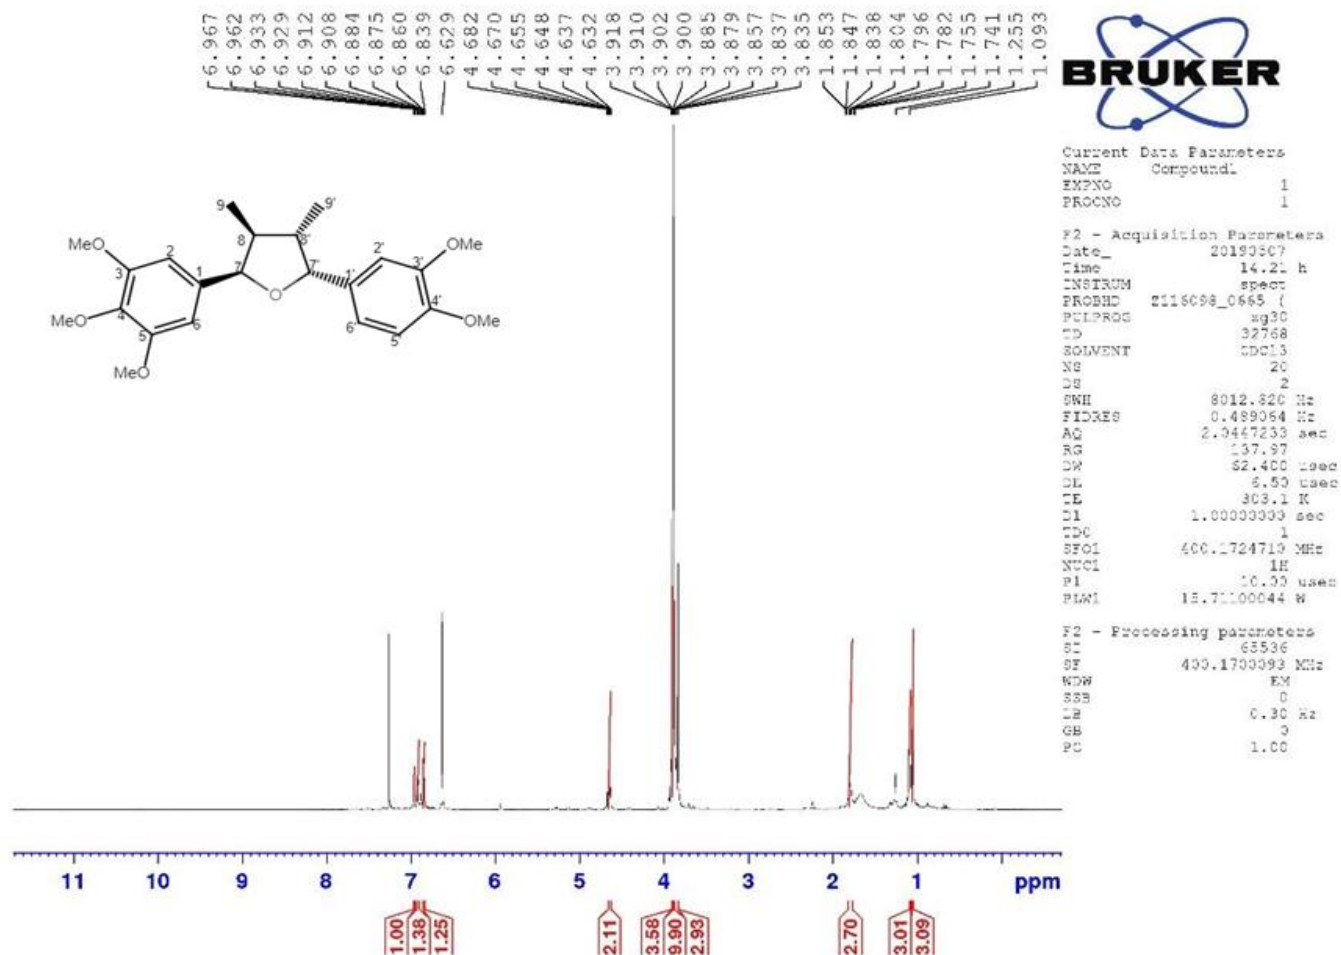

**Figure S3.**  $^{13}\text{C}$  NMR for the new (-)-5-demethoxygrandisin B in  $\text{CDCl}_3$  (100 MHz)

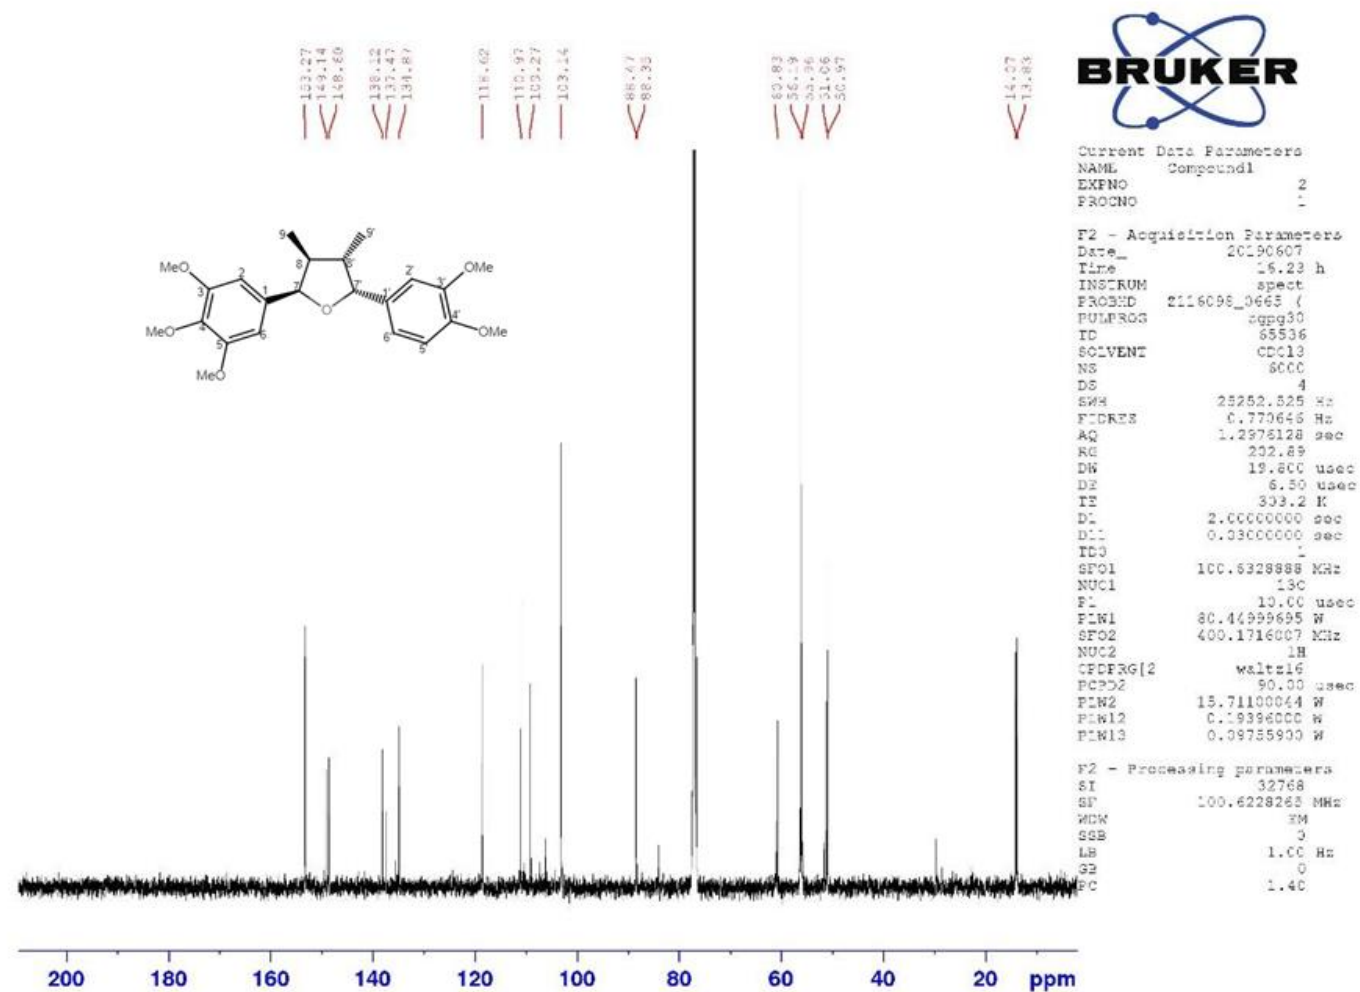

**Figure S4.** COSY for the new(-)-5-demethoxygrandisin B in CDCl<sub>3</sub>

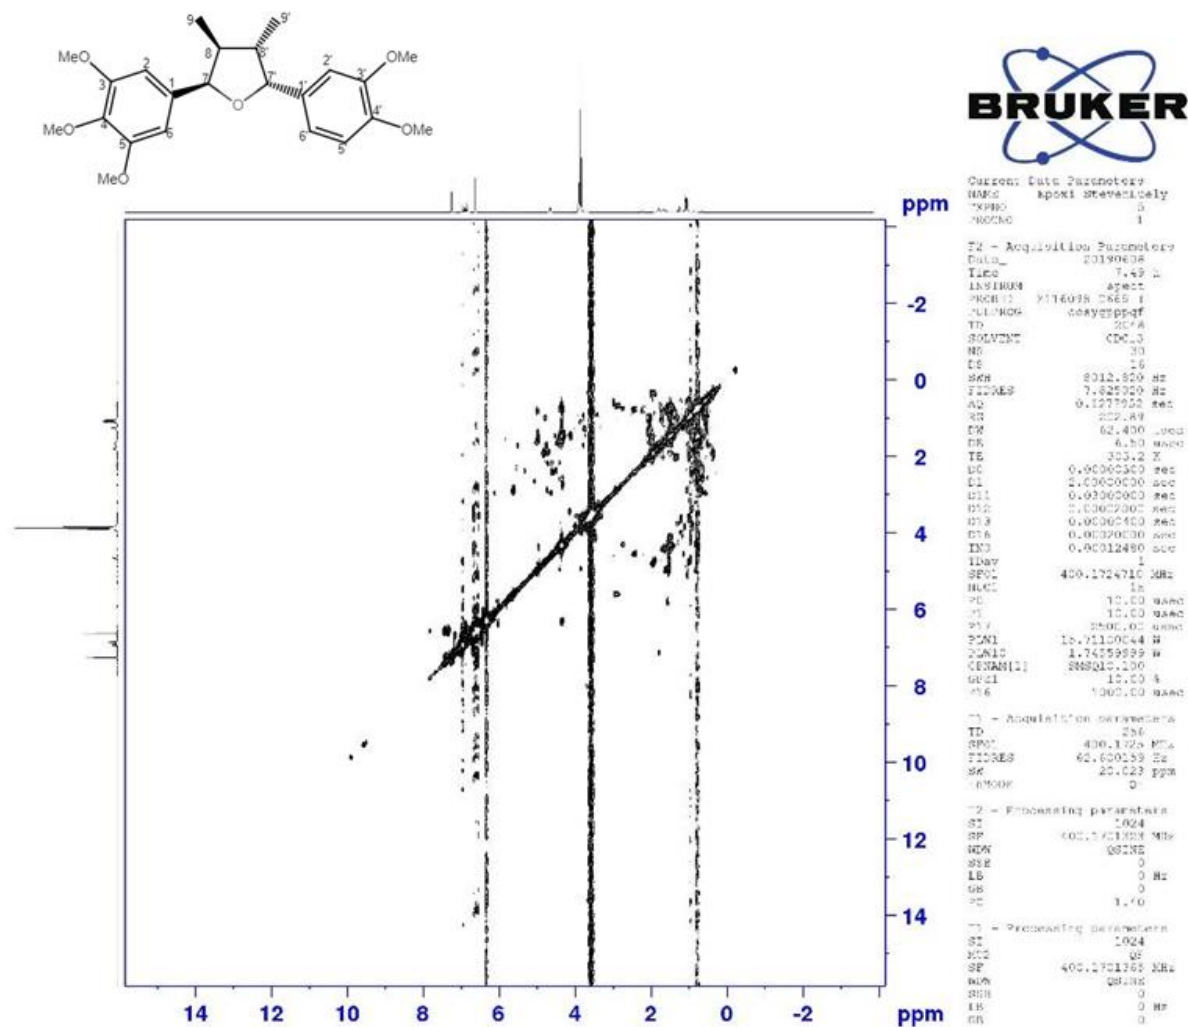

**Figure S5.** HSQC for the new (-)-5-demethoxygrandisin B in CDCl<sub>3</sub>

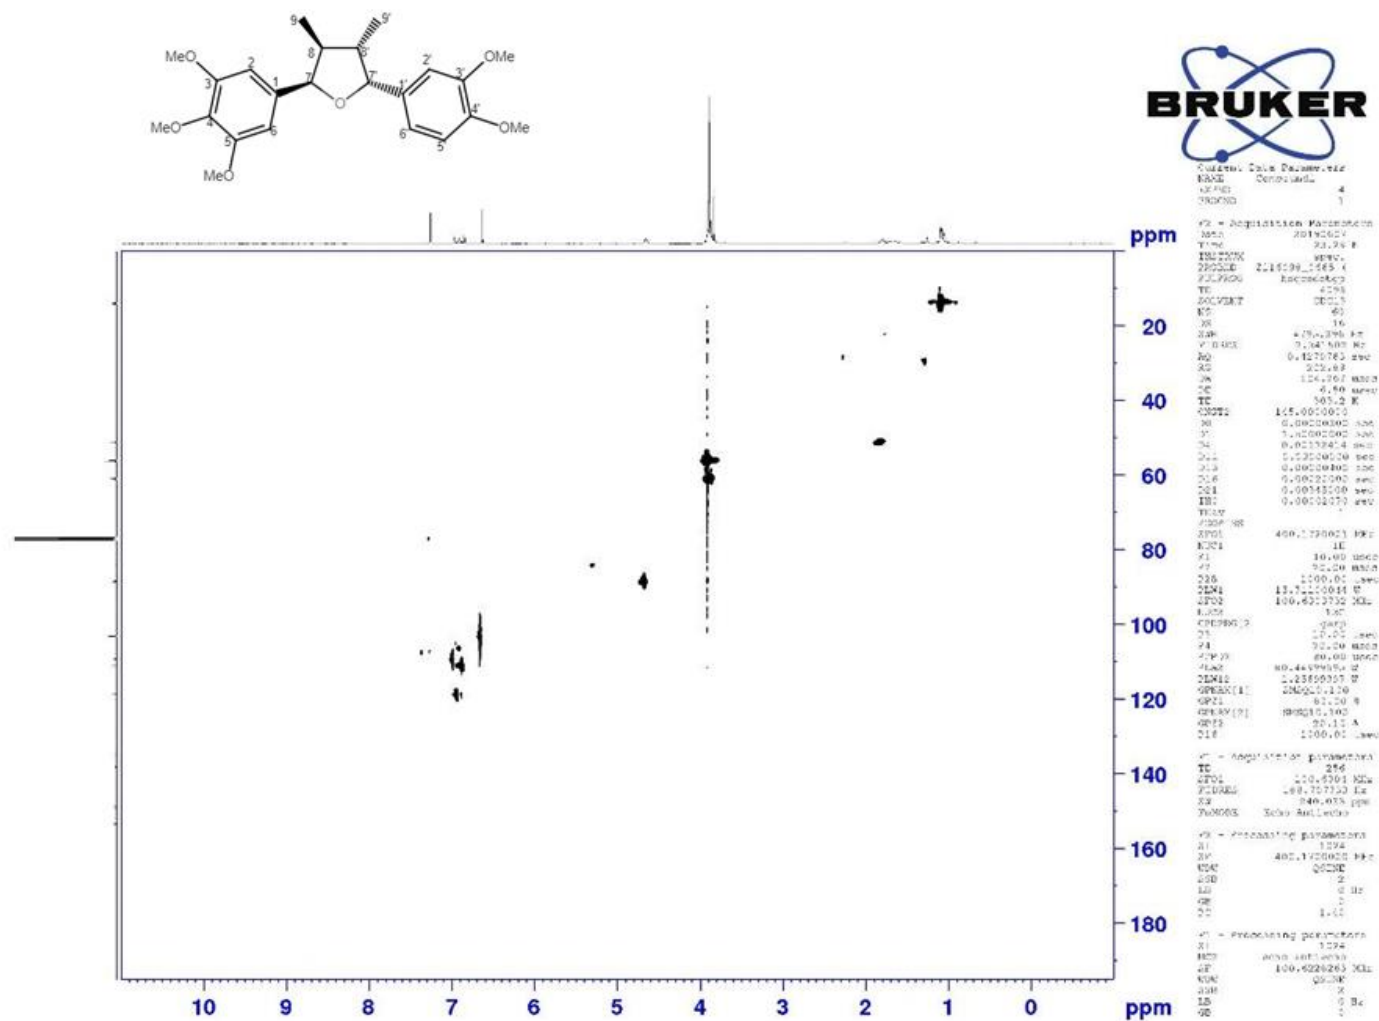

**Figure S6.** HMBC for the new (-)-5-demethoxygrandisin B in CDCl<sub>3</sub>

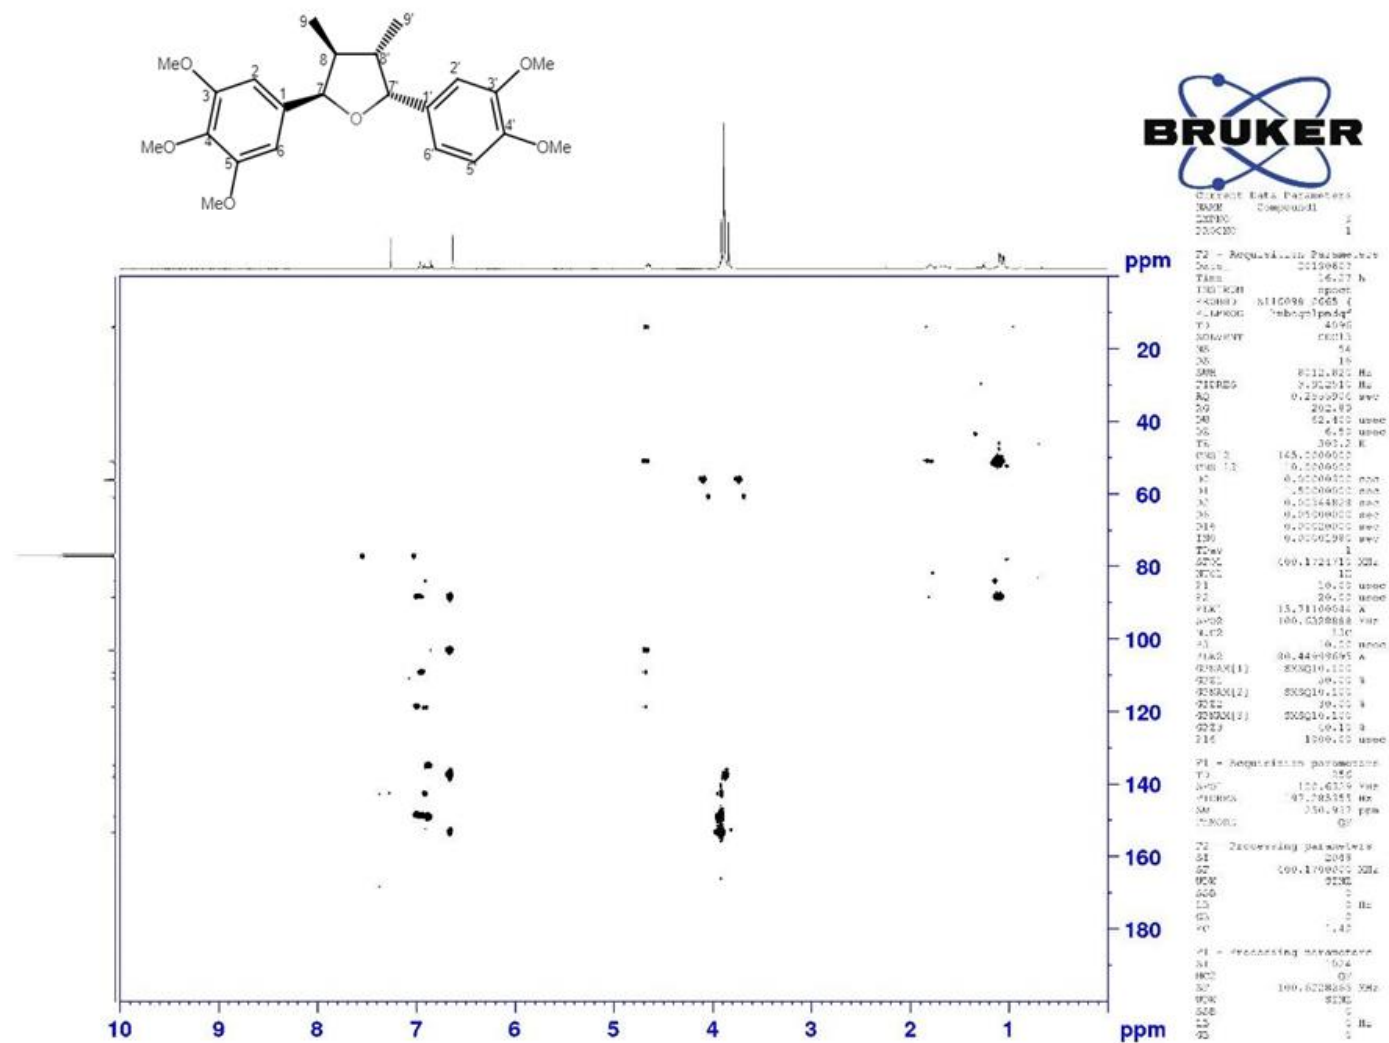

Supplement: s1 [file s1]
